# Supplementary material
Source: PubMed Central journal article supplement (PMC7339254)

|                                   |           |
|-----------------------------------|-----------|
| <b>A</b> Cell Lines               | 375       |
| Ten-Plexes                        | 42        |
| Runs                              | 504       |
| Hours of Instrument Time          | 1,512     |
| Total Peptides                    | 4,743,625 |
| Unique Peptides                   | 305,730   |
| Total Proteins                    | 12,755    |
| Peptide FDR                       | 0.04%     |
| Estimated Peptide False Positives | 1,978     |
| Protein FDR                       | 1%        |
| Estimated Protein False Positives | 138       |

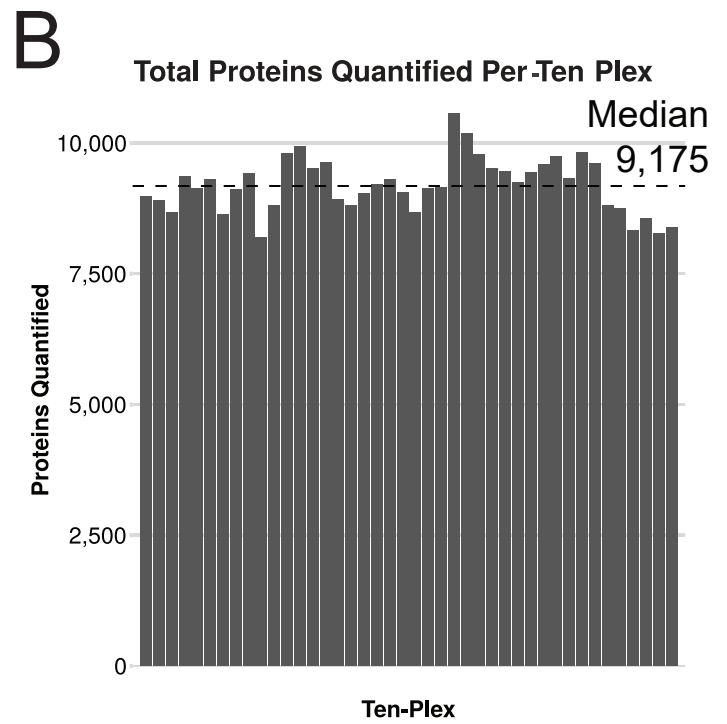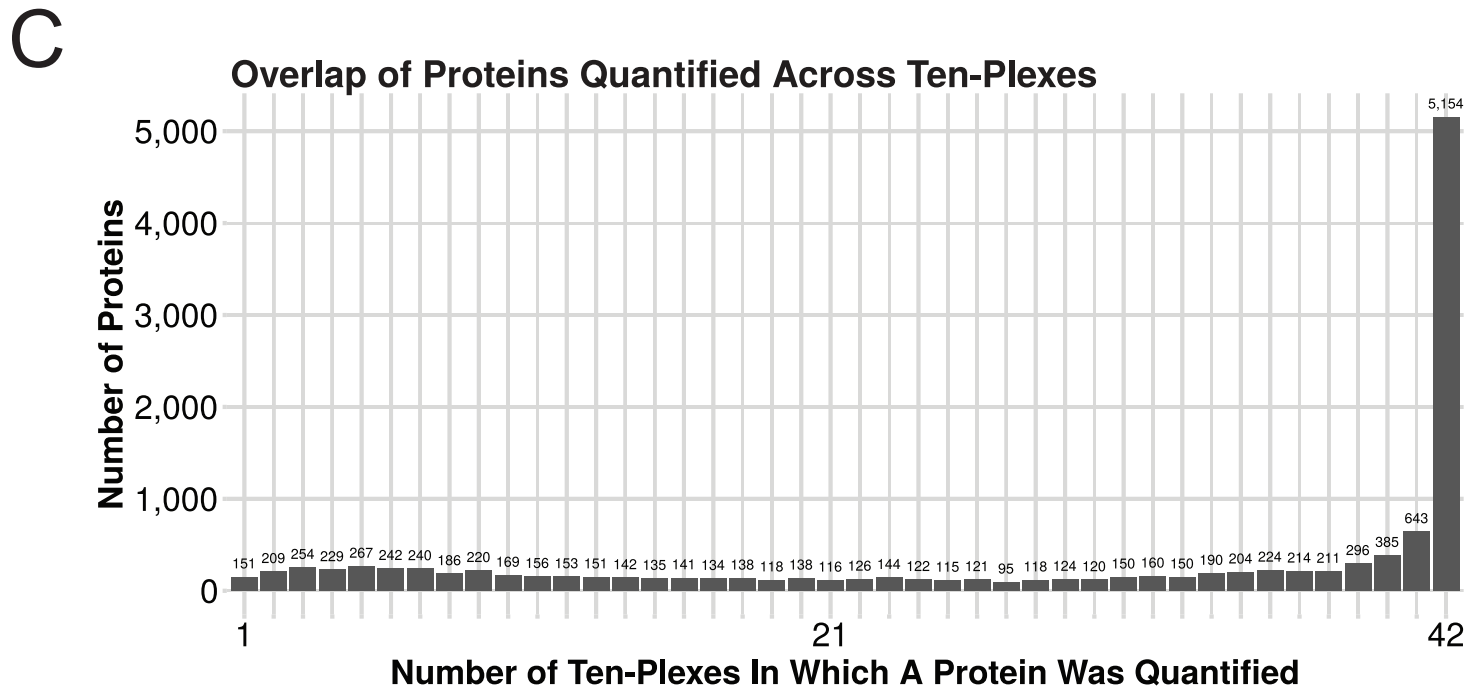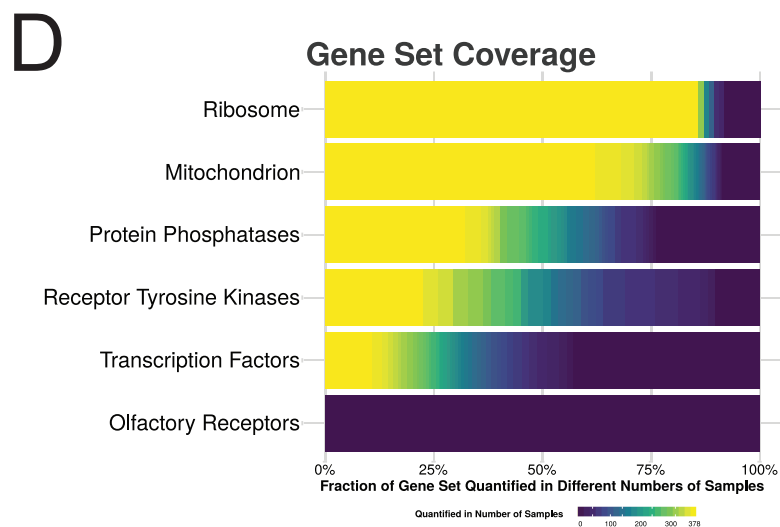

Supplement: NIHMS1569324-supplement-FS1.pdf [file NIHMS1569324-supplement-FS1.pdf]
