# Supplementary material
Source: PubMed Central journal article supplement (PMC7339254)

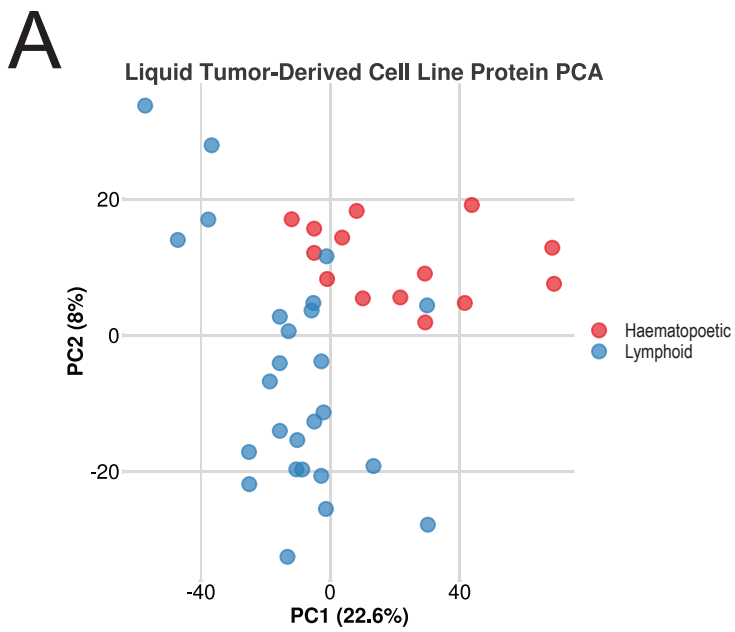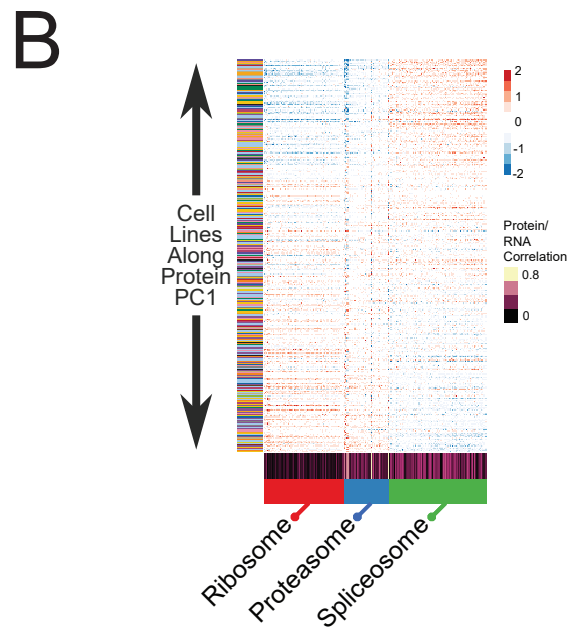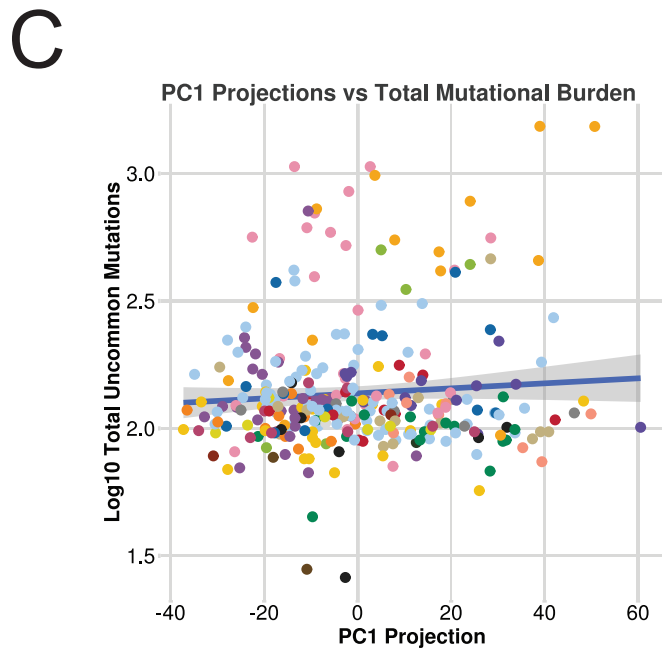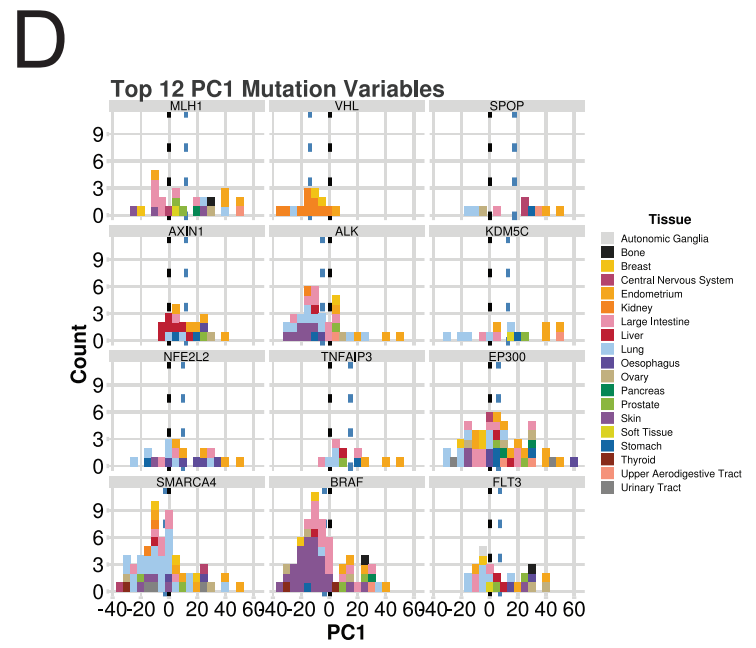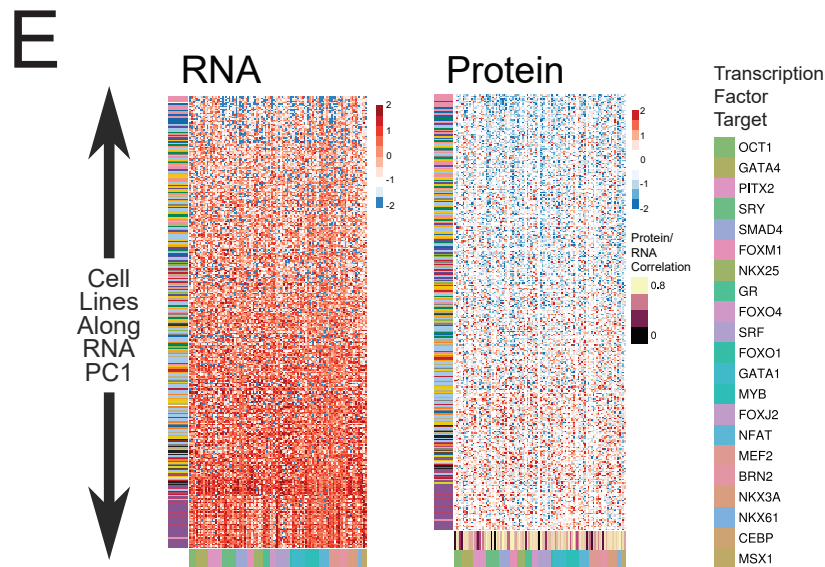

Supplement: NIHMS1569324-supplement-FS2.pdf [file NIHMS1569324-supplement-FS2.pdf]

A

## Correlations to EPCAM Expression

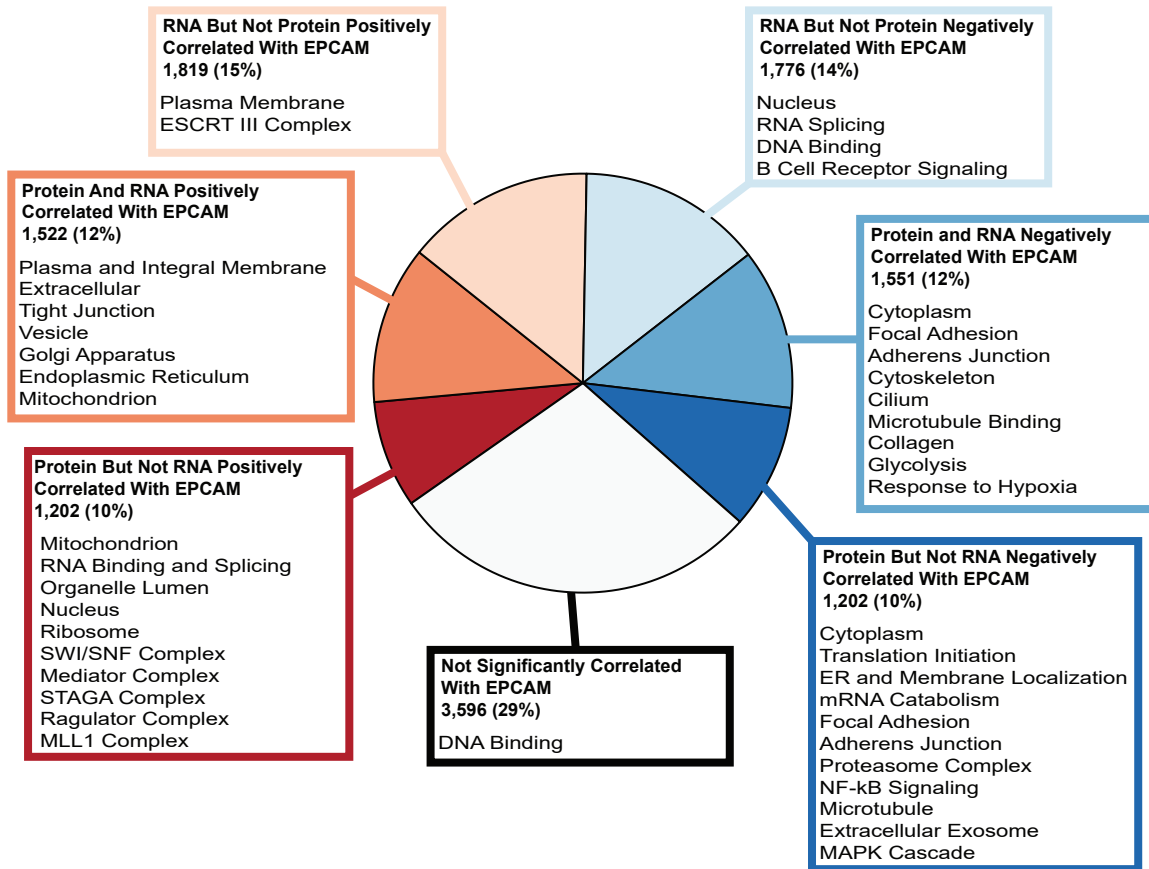

B

## Correlations to VIM Expression

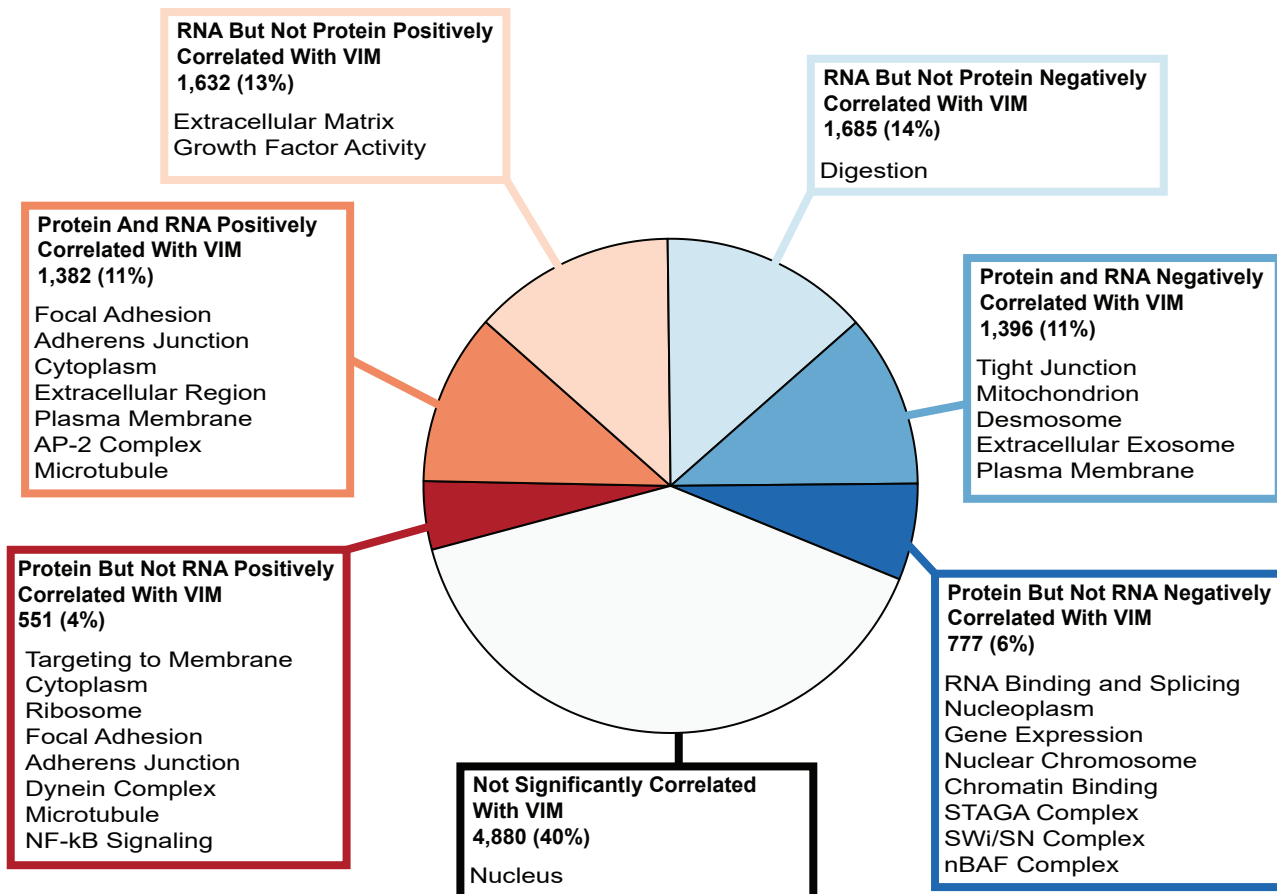

Supplement: NIHMS1569324-supplement-FS3.pdf [file NIHMS1569324-supplement-FS3.pdf]

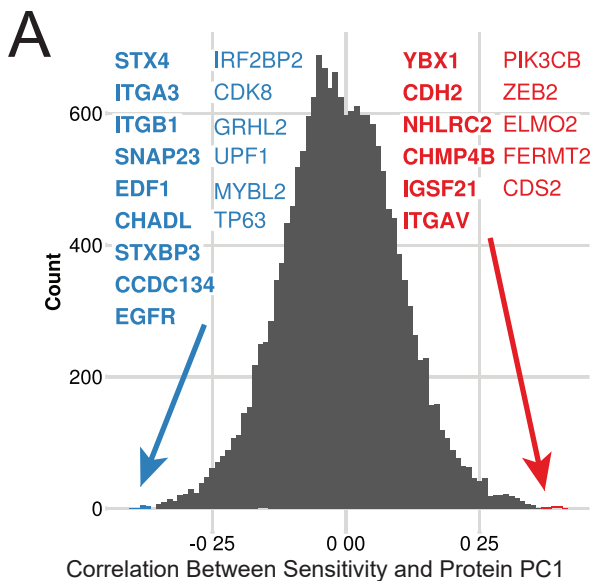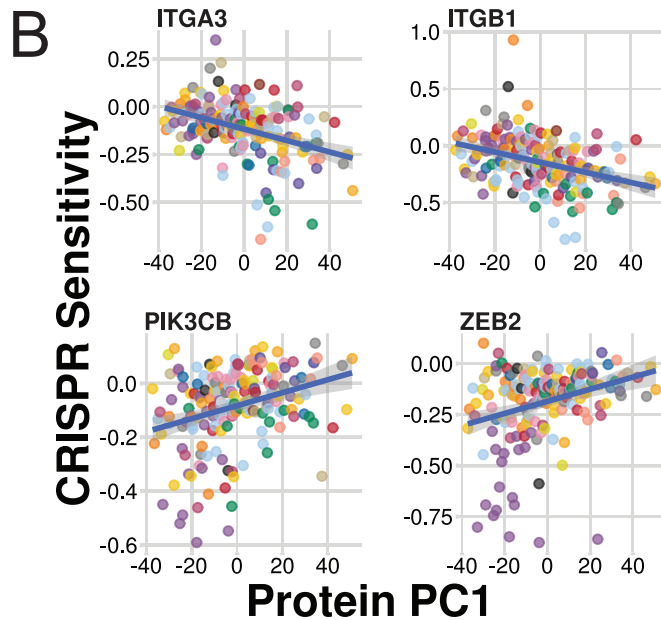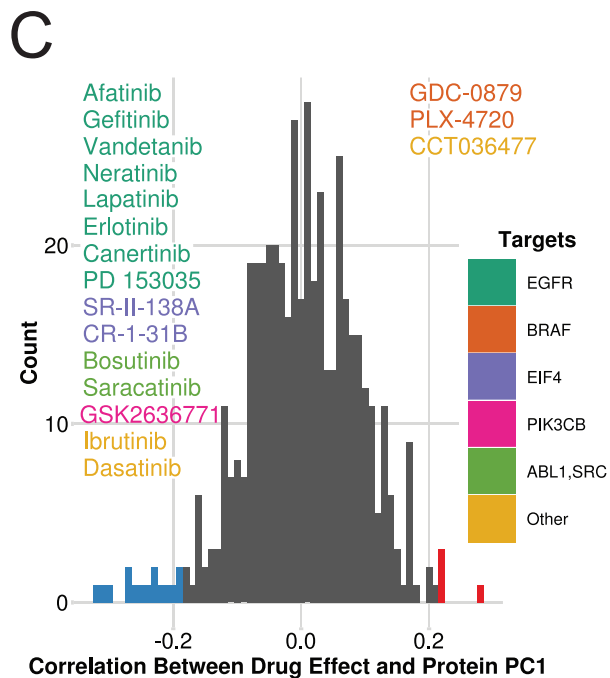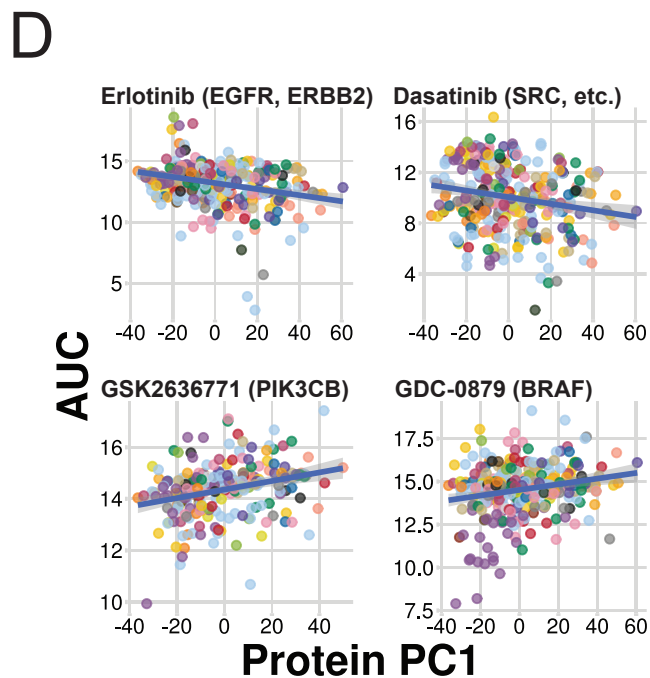

Supplement: NIHMS1569324-supplement-FS4.pdf [file NIHMS1569324-supplement-FS4.pdf]

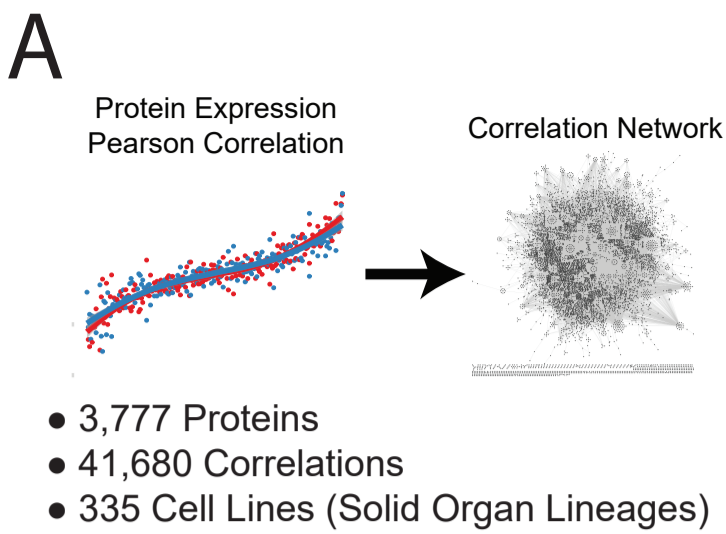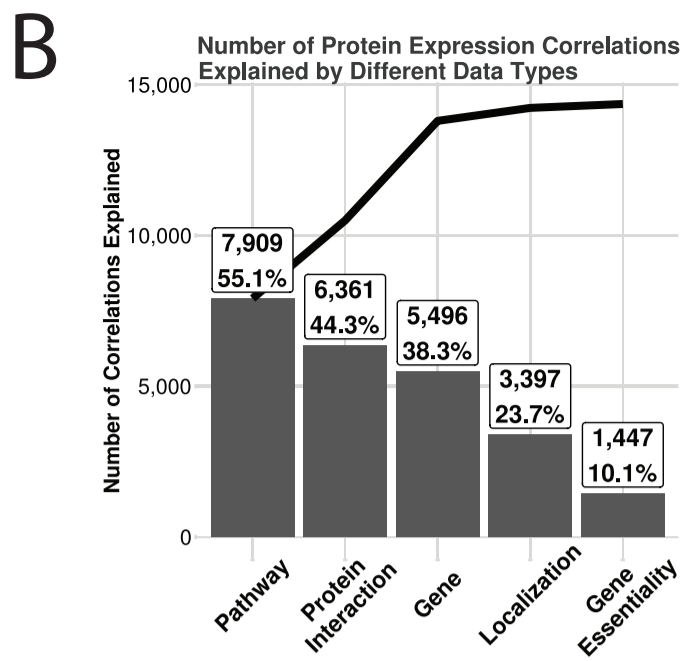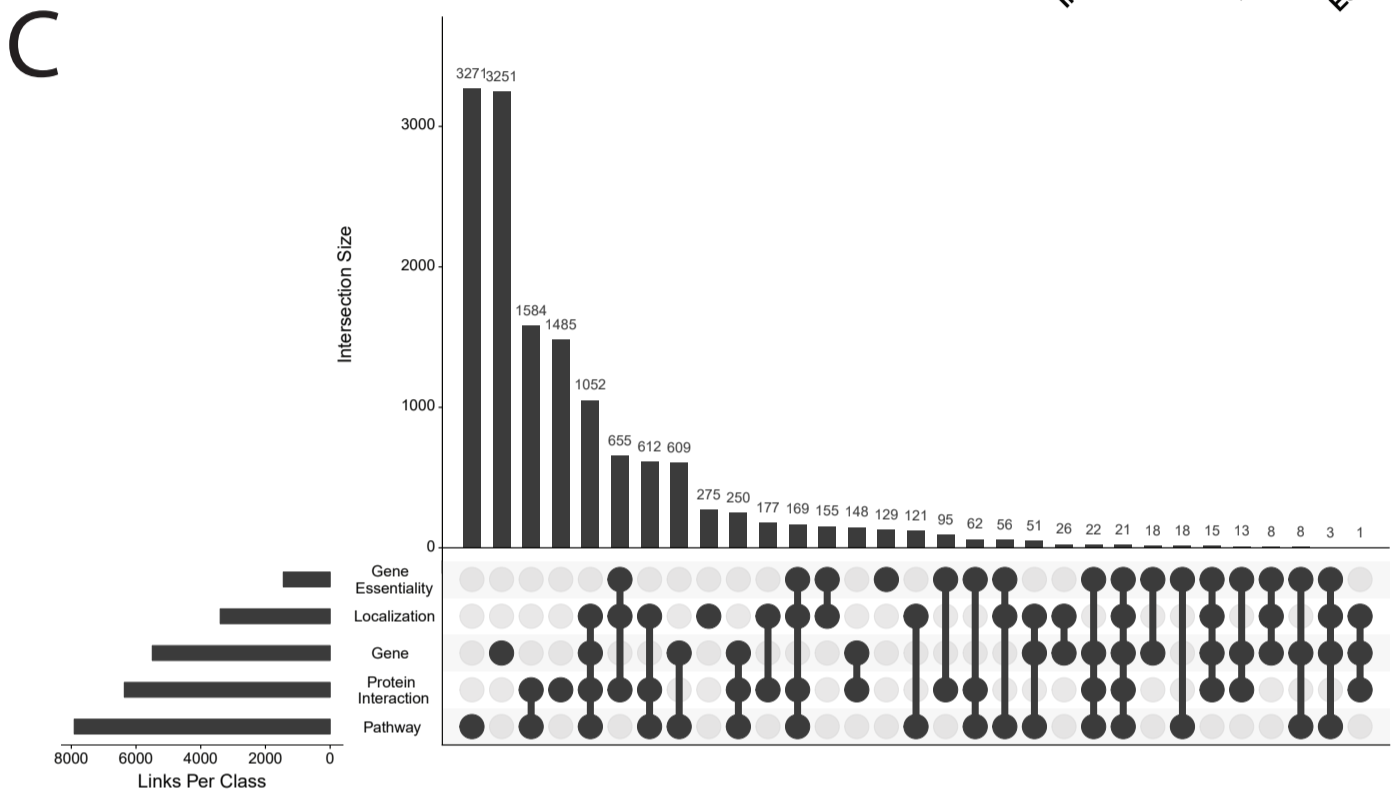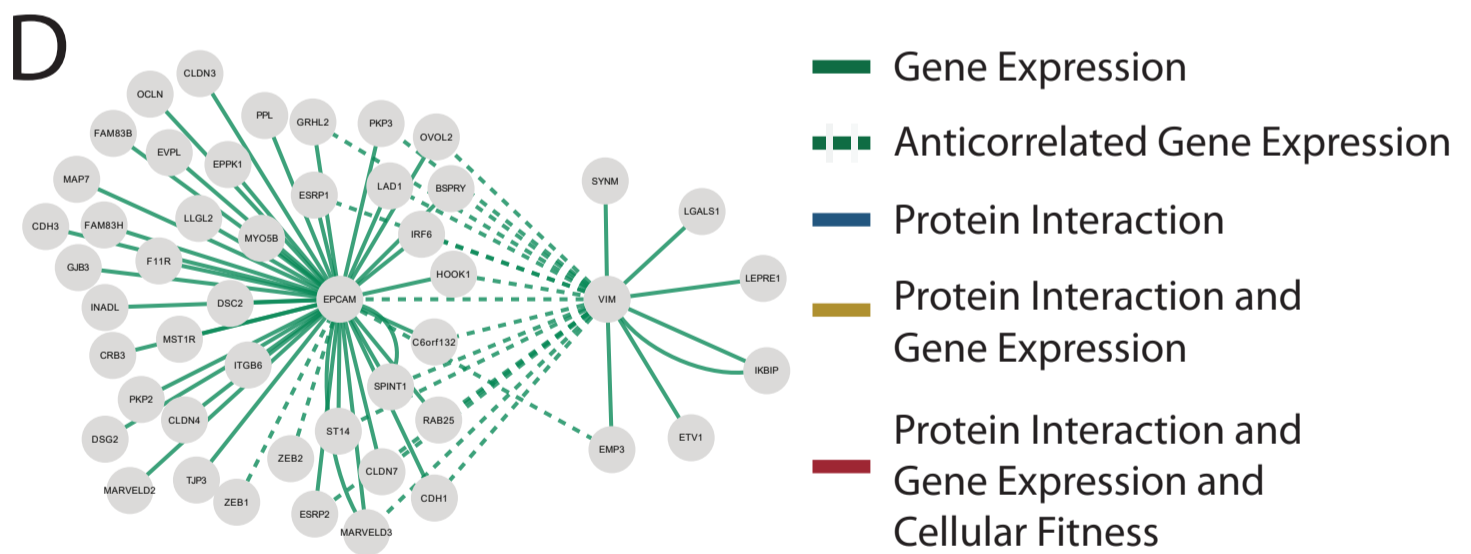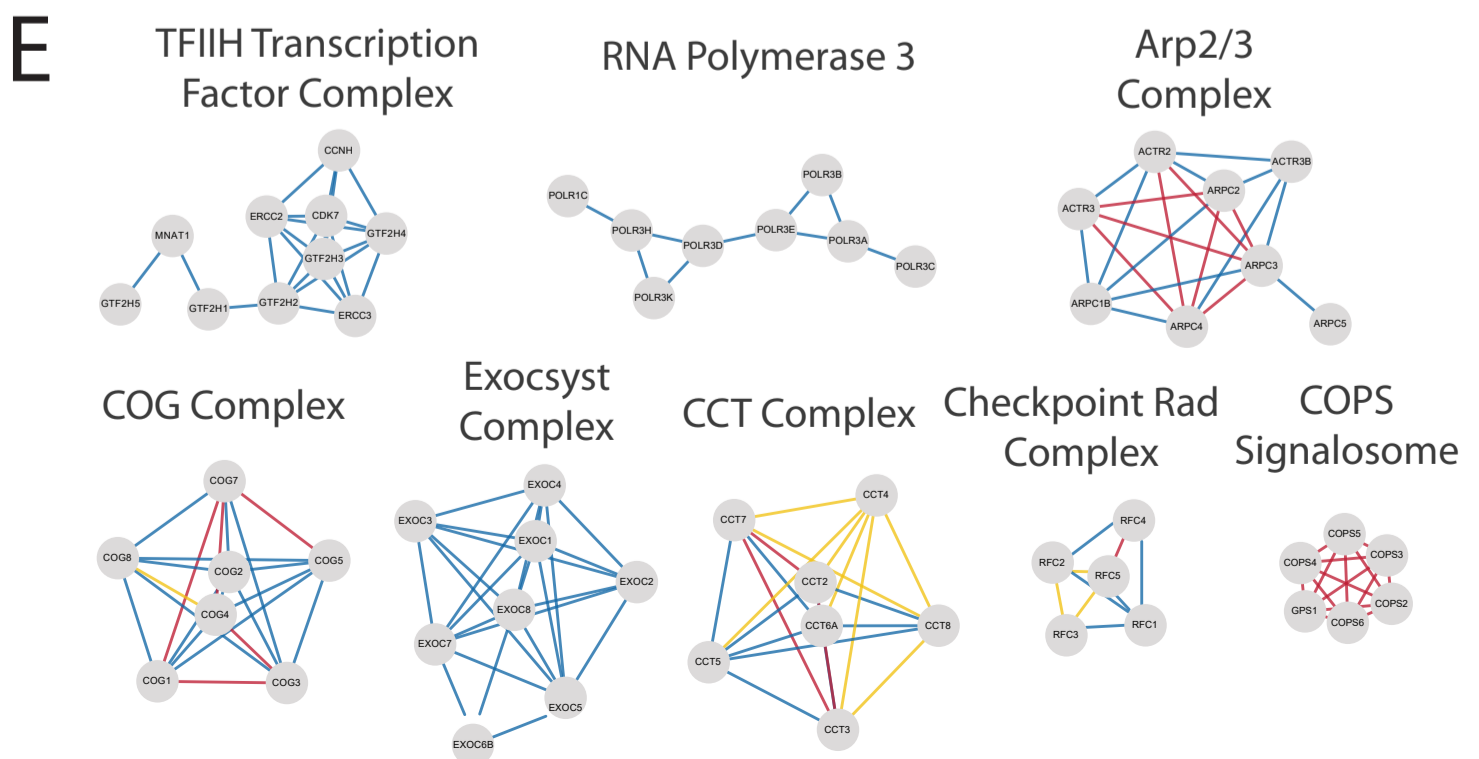

Supplement: NIHMS1569324-supplement-FS5.pdf [file NIHMS1569324-supplement-FS5.pdf]

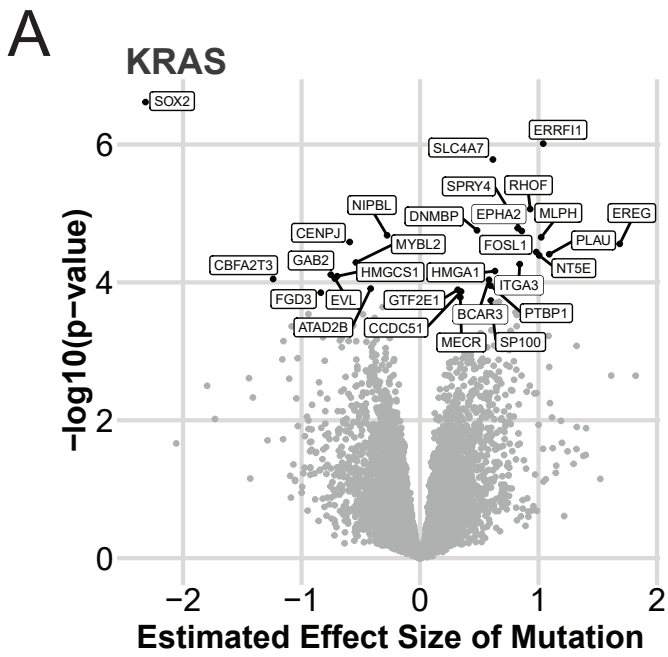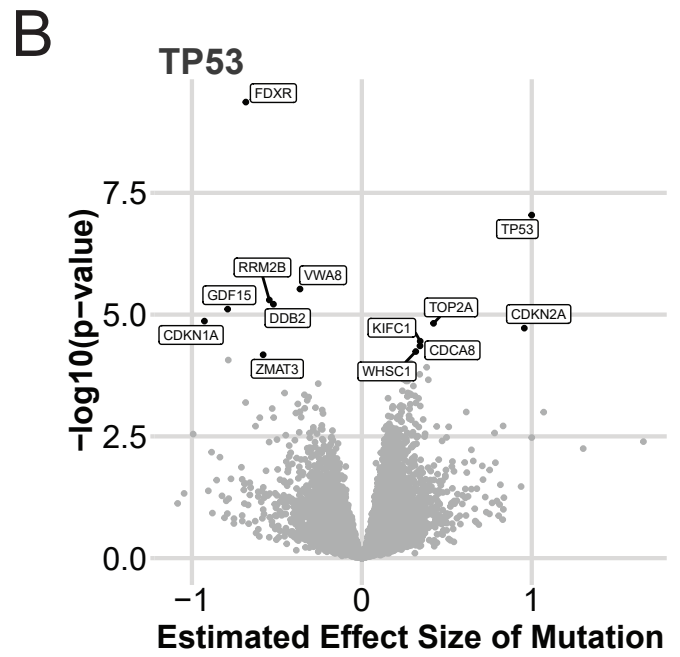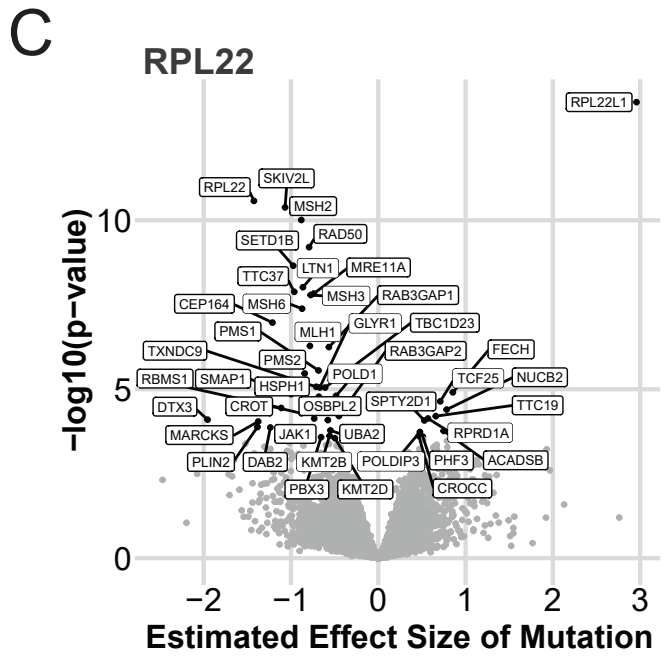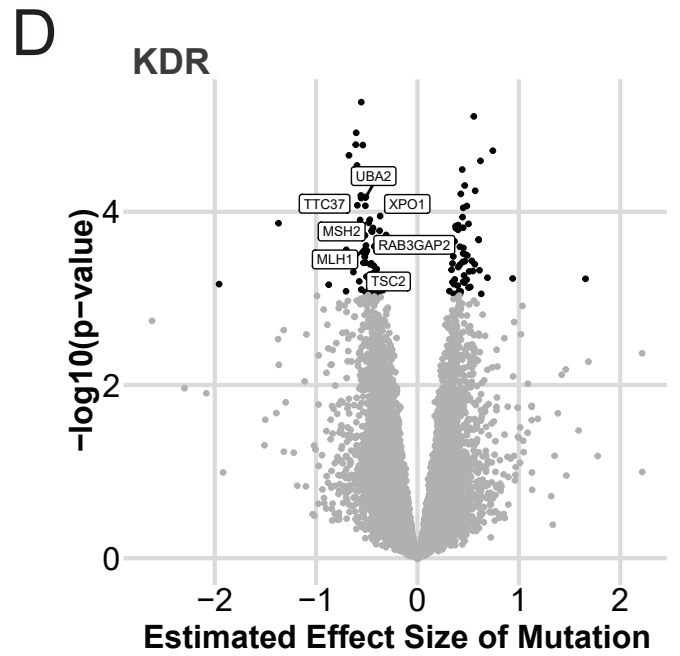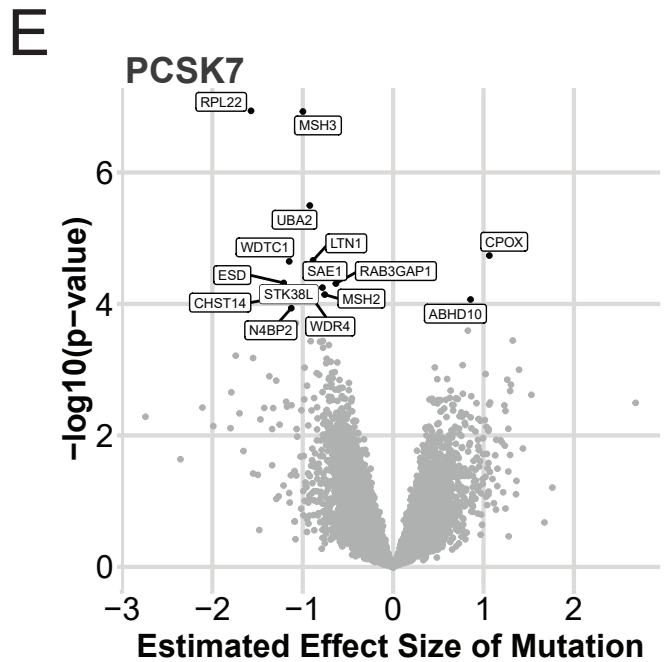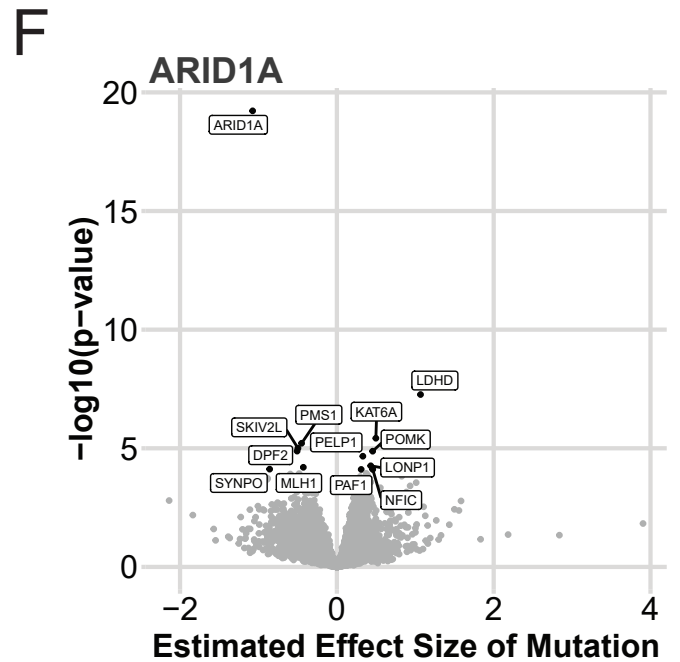

Supplement: NIHMS1569324-supplement-FS6.pdf [file NIHMS1569324-supplement-FS6.pdf]
